1 **GABA<sub>A</sub> receptor-mediated currents and hormone mRNAs in cells expressing more than one**  
2 **hormone transcript in intact human pancreatic islets**

3

4 **Authors:** Sergiy V. Korol\*, Zhe Jin & Bryndis Birnir

5

6 **Affiliation:** Department of Neuroscience, Uppsala University, 75124, Uppsala, Sweden.

7

8 **\*Corresponding author:** Dr. Sergiy V. Korol,

9 e-mail: [sergiy.korol@neuro.uu.se](mailto:sergiy.korol@neuro.uu.se)

10

## 11 **Abstract**

12 In pancreatic islets the major cell-types are  $\alpha$ ,  $\beta$  and  $\delta$  cells, secreting the hormones glucagon  
13 (GCG), insulin (INS) and somatostatin (SST), respectively. The GABA ( $\gamma$ -aminobutyric acid)  
14 signalling system is expressed in human pancreatic islets. We have previously used single-cell  
15 RT-PCR in combination with current recordings to correlate expression of single hormone  
16 transcript with functional GABA<sub>A</sub> receptor (iGABA<sub>A</sub>R) properties in islets. Here we extended  
17 these studies to islet cells from non-diabetic and type 2 diabetic donors that express mRNAs for  
18 more than one hormone. We detected cells expressing double ( $\alpha/\beta$ ,  $\alpha/\delta$ ,  $\beta/\delta$  cell-types) and triple  
19 ( $\alpha/\beta/\delta$  cell-type) hormone transcripts. The most common mixed-identity cell-type was the  $\alpha/\beta$   
20 group where the cells could be grouped into  $\beta$ - and  $\alpha$ -like subgroups. The  $\beta$ -like cells had low  
21 *GCG/INS* expression ratio ( $< 0.6$ ) and significantly higher frequency of single-channel iGABA<sub>A</sub>R  
22 openings than the  $\alpha$ -like cells where the *GCG/INS* expression ratio was high ( $> 1.2$ ). The  
23 difference in expression levels and single channel iGABA<sub>A</sub>R characteristics varied in the  $\alpha/\beta/\delta$   
24 cell-type. No correlation was observed between the cell-types identity with time in culture or cell  
25 size. Clearly, multiple hormone transcripts can be expressed in islet cells whereas iGABA<sub>A</sub>R  
26 functional properties appear  $\alpha$  or  $\beta$  cell specific.

27

28 **Keywords:** insulin, glucagon,  $\beta$  cell,  $\alpha$  cell, hormone transcript, human pancreatic islet, GABA,  
29 GABA<sub>A</sub> receptor, type 2 diabetes

30

## 31 **Introduction**

32 The three major cell types of the endocrine pancreas are  $\alpha$ ,  $\beta$  and  $\delta$  cells [1], producing glucagon,  
33 insulin and somatostatin, respectively. When the physiological or pathological aspects of  
34 pancreatic islets are studied, the function of  $\alpha$  or  $\beta$  cells is traditionally in the focus. However,  
35 emerging evidence indicates there are subgroups of pancreatic islet cells that previously were  
36 overlooked [2, 3]. Among these are groups of cells expressing more than one hormone transcript

37 [4-6]. They may express hormone transcripts in different combinations such as *GCG/INS*,  
38 *INS/SST*, *GCG/SST* or *GCG/INS/SST* and have different levels in individual cells. Such cells are  
39 here termed “mixed-identity cells”. These cells may potentially represent different developmental  
40 stages of the primary cell types [1, 7] but also may appear as a consequence of exposure to  
41 different conditions, e.g. development of obesity or diabetes [4, 5].

42 Elements of the different neurotransmitter signalling machineries are found within human  
43 pancreatic islets and one of them is the GABA signalling system [8-11]. This system has been  
44 shown to modulate exocytosis [10], insulin and glucagon secretion [8, 9] and regulate  $\beta$  cell  
45 replication [11, 12]. In addition, the GABA<sub>A</sub> receptors in  $\beta$  cells in intact human pancreatic islets  
46 and their functional properties have been recently characterized in details [10]. Here we examined  
47 the prominence of the single and multiple hormone transcript-expressing cells within intact  
48 human pancreatic islets from non-diabetic and type 2 diabetic donors, examined patterns of  
49 activity of iGABA<sub>A</sub>Rs in the mixed-identity cells and correlated the channel characteristics with  
50 the hormones’ mRNA ratios. Together, the results identify the iGABA<sub>A</sub>Rs as a functional marker  
51 of the physiological identity of the mixed-identity cell subtype.

52

## 53 **Methods**

54 **Intact human islets of Langerhans.** The Nordic Network for Clinical Islet Transplantation  
55 generously provided human pancreatic islets. All procedures were approved by the regional ethics  
56 committee in Uppsala (Sweden). Experiments were carried out in accordance with the guidelines  
57 and regulations stipulated by appropriate Swedish and European legislation and informed consent  
58 was obtained from donors or their relatives. The pancreata from non-diabetic and type 2 diabetic  
59 donors were treated by collagenase, and the islets were isolated by Biocoll gradient centrifugation  
60 [13]. After that the islets were picked and cultured in CMRL 1066 (ICN Biomedicals, Costa  
61 Mesa, CA, USA) with the addition of 10 mM HEPES, 2 mM L-glutamine, 50  $\mu$ g/ml gentamicin,  
62 0.25  $\mu$ g/ml fungizone (GIBCO, BRL, Gaithersburg, MD, USA), 20  $\mu$ g/ml ciprofloxacin (Bayer

63 Healthcare, Leverkusen, Germany), and 10 mM nicotinamide at 37 °C in a high-humidity  
64 atmosphere containing 5 % CO<sub>2</sub>, vol/vol and used in the experiments from the second up to  
65 fourteen day of culturing.

66

67 **Electrophysiological recordings.** The electrophysiological recordings from cells in the  
68 superficial layers in intact islets were done in the whole-cell patch-clamp configuration using the  
69 blind approach. The intact islet was held by the wide-bore holding pipette, and the cell within the  
70 islet was approached by the recording pipette from the opposite side. The composition of  
71 extracellular solution (in mM): 137 NaCl, 5.6 KCl, 2.6 CaCl<sub>2</sub>, 1.2 MgCl<sub>2</sub>, 10 HEPES and 20  
72 glucose (pH 7.4 using NaOH). The high glucose concentration enhances the vesicular release  
73 [14], and we used this phenomenon to stimulate GABA release from the  $\beta$  cells and thus  
74 maximize the interstitial GABA concentration within the islets in our experiments in order to  
75 facilitate the detection of the GABA<sub>A</sub> receptor activity. The intracellular solution consisted of  
76 (mM): 135 CsCl, 30 CsOH, 1 MgCl<sub>2</sub>, 10 EGTA, 5 HEPES and 3 Mg-ATP (pH 7.2 with HCl).  
77 Drugs were purchased from Sigma-Aldrich (Steinheim, Germany) or Ascent Scientific (Bristol,  
78 UK). Recordings were done using an Axopatch 200B amplifier, filtered at 2 kHz, digitized on-line  
79 at 10 kHz using an analog-to-digital converter and Clampex 10.5 (Molecular Devices, San Jose,  
80 CA, USA) software. The access resistance was monitored and if it changed by more than 25%, the  
81 recording was rejected.

82

83 **Cytoplasm harvesting and single-cell RT-PCR.** The cytosome harvesting procedure and single-  
84 cell RT-PCR was previously described [10, 15]. Briefly, after completing the patch-clamp  
85 experiment in the whole-cell configuration, the negative pressure was applied to the back of the  
86 pipette and was relieved at the moment of the whole-cell configuration destroying, and then the  
87 pipette content was locked at the atmospheric pressure. These manipulations allowed to collect  
88 the cytosome from the cell the electrophysiological recording was done from. The pipette content

89 (5  $\mu$ L) was expelled to a 200- $\mu$ L RNase-free PCR tube. The collected cytosome was subjected to  
90 the reverse transcription (RT) performed with Verso™ cDNA synthesis kit (Thermo Scientific  
91 Waltham, MA, USA). The 20  $\mu$ L of RT-reaction was exposed to 42 °C for 30 min and then  
92 incubated at 95 °C for 2 min. PCR was accomplished according to a standard procedure [10]. The  
93 primers for hormone transcripts are glucagon (forward: GCAACGTTCCCTTCAAGACAC,  
94 reverse: ACTGGTGAATGTGCCCTGTG), insulin (forward: CCATCAAGCAGATCACTG,  
95 reverse: CACTAGGTAGAGAGCTTCC), and somatostatin (forward:  
96 CCCAGACTCCGTCAGTTTCT, reverse: AAGTACTTGGCCAGTTCCTGC). The efficiency of  
97 primers for each hormone transcript was in the range between 99 and 100%. The relative  
98 expression of pairs of hormone transcripts (mRNA) in individual mixed-identity cells was defined  
99 as  $2^{-(Ct[mRNA1]-Ct[mRNA2])}$ . The melting curve of the PCR product was examined and/or PCR product  
100 was run on a 1.5% agarose gel. RNA from whole human islet samples and the intracellular  
101 solution or water served as the positive control and negative control, respectively.

102

103 **Data analysis.** Statistical dependences between different parameters measured in  
104 electrophysiological or single-cell RT-PCR experiments were tested by Spearman correlation  
105 using GraphPad Prism 7 (La Jolla, CA, USA). The Tukey method was used for the detection of  
106 outliers which were excluded from the analysis. Nonparametric Mann-Whitney test was used to  
107 compare groups which contained not normally distributed data. Significance level was set at  $P <$   
108 0.05. The values are mean  $\pm$  S. E. M.

109

## 110 **Results**

111 **Cell-types identified by hormone mRNA expression in intact pancreatic islets from non-**  
112 **diabetic and type 2 diabetic donors.** GABA-activated single-channel currents were detected in  
113 383 cells in intact islets from 109 donors. The cell-type was determined by single-cell RT-PCR  
114 analysis of the levels of islet insulin (*INS*), glucagon (*GCG*) and somatostatin (*SST*) transcripts for

115 every individual cell recorded from. Hormone transcripts were detected in 174 cells from 45 non-  
 116 diabetic and 8 type 2 diabetic donors ( $HbA1c = 6.5 \pm 0.16$ , mean  $\pm$  S.E.M. (48 mmol/mol)). Table  
 117 1 shows the distribution of the cell-types identified. Characteristics of GABA-activated currents in  
 118 the  $\alpha$ ,  $\beta$  and  $\delta$  single-hormone cell-types have been described [10]. Here we analysed the samples  
 119 containing multiple hormone transcript-expressing cells. For islets from non-diabetic and type 2  
 120 diabetic donors, single-hormone transcript was detected in 55% and 48% of the cells,  
 121 respectively, with 44% (non-diabetic) and 32% (type 2 diabetic donors) of the cells being insulin-  
 122 positive  $\beta$  cells (Fig. 1A). The remaining cells, 45% from non-diabetic and 52% from type 2  
 123 diabetic donors, were positive for more than one hormone transcript. The frequency of the  
 124 specific subtypes of mixed-identity cells i.e.  $\alpha/\beta$ ,  $\beta/\delta$ ,  $\alpha/\delta$ ,  $\alpha/\beta/\delta$ , varied somewhat between the  
 125 non-diabetic and type 2 diabetic donor islets, with the most notable difference being a decrease in  
 126  $\beta/\delta$  and an increase in mixed-identity cell subtypes expressing the *GCG* in type 2 diabetic donors  
 127 (Fig. 1A, Table 1). As the data from type 2 diabetic donors was limited and overlapped with the  
 128 data from the non-diabetic donors, we combined the results from the two groups when examining  
 129 single-channel properties and effects of days in culture on the channel properties (Fig. 2, 3).

130 **Table 1.** Cell-types identified based on expression of hormone mRNAs in pancreatic islets from  
 131 non-diabetic and type 2 diabetic donors.

| Cell type                     | $\alpha$ | $\beta$ | $\delta$ | $\alpha/\beta$ | $\beta/\delta$ | $\alpha/\delta$ | $\alpha/\beta/\delta$ | Total |
|-------------------------------|----------|---------|----------|----------------|----------------|-----------------|-----------------------|-------|
| <b>Non-diabetic islets</b>    |          |         |          |                |                |                 |                       |       |
| n cells                       | 12       | 65      | 4        | 34             | 18             | 2               | 14                    | 149   |
| <b>Type 2 diabetic islets</b> |          |         |          |                |                |                 |                       |       |
| n cells                       | 3        | 8       | 1        | 8              | 1              | 1               | 3                     | 25    |

132

133 In rodent islets the cell size normally correlates with the major cell types [15, 16] but the  
 134 situation is somewhat different for human islet cells where we did not detect any difference in cell  
 135 size among  $\alpha$ ,  $\beta$  and  $\delta$  cells in intact islets [10]. However, it is possible that alterations in size  
 136 reflect transdifferentiation of one cell-type to another. We, therefore, examined if the mixed-  
 137 identity cells differed in size or if the time in culture influenced the cells' diameter. Fig. 1B shows

138 that the different subtypes of cells were similar in size, as determined from cell membrane  
139 capacitance measurements, and that the cell size did not correlate with the time in culture after  
140 isolation of islets. We further examined if the relative expression level of a pair of hormone  
141 transcripts in the mixed-identity cells correlated with the cells size but no correlation was found  
142 between these two parameters (Fig. 1C).

143

144 **iGABA<sub>A</sub> receptor-mediated currents in the different subtypes of the mixed-identity cells.** We  
145 further analysed the recordings of iGABA<sub>A</sub>R-mediated currents in mixed-identity cells in order to  
146 examine if a particular subtype of the mixed-identity cells had a characteristic pattern of GABA-  
147 activated currents. The single-channel iGABA<sub>A</sub>R currents were recorded in 87% of the mixed-  
148 identity cells analysed with both electrophysiological and single-cell RT-PCR techniques. Fig. 2A  
149 shows the distribution of the *GCG/INS* expression ratio for individual mixed-identity  $\alpha/\beta$  cells as a  
150 function of days in culture after the isolation of pancreas. No effect of time in culture on the  
151 *GCG/INS* expression ratio was detected (Spearman correlation coefficient  $r = 0.22$ ,  $P = 0.248$ ,  $n =$   
152 30 cells).

153 Interestingly, recordings from  $\alpha/\beta$  cells with higher relative *INS* expression (corresponding  
154 to lower *GCG/INS* values) have higher frequency and larger amplitudes of iGABA<sub>A</sub>R-mediated  
155 currents than those with higher *GCG/INS* expression ratio (see Fig. 2Aa, Ba and Ad, Bd). In  
156 agreement with this observation, we found strong anticorrelation between relative *GCG/INS*  
157 expression levels and single-channel iGABA<sub>A</sub>R opening frequency (Fig. 3A; Spearman  
158 correlation coefficient  $r = -0.89$ ,  $P < 0.0001$ ,  $n = 18$ ). Thus, the  $\alpha$ -like  $\alpha/\beta$  cells had relative  
159 expression levels of  $1.2 < GCG/INS < 550$  and the  $\beta$ -like  $\alpha/\beta$  cells of  $0.002 < GCG/INS < 0.6$  and  
160 the difference in frequencies of the single-channel iGABA<sub>A</sub>R openings for  $\alpha$ -like  $\alpha/\beta$  cells,  $0.054$   
161  $\pm 0.011$  Hz, and for  $\beta$ -like  $\alpha/\beta$  cells,  $7.30 \pm 2.57$  Hz, was significantly different (mean  $\pm$  S.E.M,  
162 nonparametric Mann-Whitney test,  $P < 0.0001$ ,  $n = 9$  in the  $\beta$ -like group,  $n = 8$  in the  $\alpha$ -like group;  
163 Fig. 3B). This is in line with the patterns of activities of iGABA<sub>A</sub>Rs in single hormone transcript-

164 expressing  $\alpha$  and  $\beta$  cells [10] (Fig. 2G) and can be used to discriminate between  $\alpha$ - and  $\beta$ -like  $\alpha/\beta$   
165 cells. We also examined if the frequency of single-channel openings of iGABA<sub>A</sub>Rs altered with  
166 duration of the islets in culture but no change was detected (Spearman correlation coefficient  $r = -$   
167 0.35,  $P = 0.15$ ,  $n = 18$ ).

168         Glucagon-like peptide-1 (GLP-1) receptors are not expressed in human  $\alpha$  cells [3, 17].  
169 Accordingly, in a cell with high *GCG/INS* expression ratio, no potentiation of single-channel  
170 iGABA<sub>A</sub>R activity with GLP-1 application was observed (Fig. 2Ad, Bd) consistent with an  $\alpha$  cell-  
171 like phenotype. Moreover, in a mixed-identity  $\alpha/\delta$  cell with high expression of *GCG* relative to  
172 *SST* (Fig. 2C), we recorded low-frequency single-channel iGABA<sub>A</sub>R-mediated events with low  
173 conductance that also corresponds to an  $\alpha$ -like cell phenotype (Fig. 2D). In the mixed-identity  
174 cells with higher *INS/SST* expression ratios (Fig. 2E), high activity level of the single-channel  
175 events with the current amplitudes comparable to those obtained in single-transcript (*INS* only)  $\beta$   
176 cells was generally observed, and the currents were potentiated by GLP-1 application (Fig. 2Fg–  
177 i). We also recorded currents through iGABA<sub>A</sub>Rs in mixed-identity  $\alpha/\beta/\delta$  cells. The most  
178 prominent single-channel iGABA<sub>A</sub>R currents were recorded in cells with the highest *INS*  
179 expression among all three hormone transcripts (Fig. 3Cb,c and Db,c). However, the difference in  
180 hormone transcripts expression levels varied in the mixed-identity  $\alpha/\beta/\delta$  cells and the frequency of  
181 the single-channel iGABA<sub>A</sub>R currents was relatively low in these cells (see Fig. 3Db,c and e.g.  
182 Fig. 2Ba, Fi).

183

## 184 **Discussion**

185 In recent years, reports have emerged indicating that there are groups of pancreatic islet cells that  
186 express more than one hormone transcript [2, 3, 7]. It is possible that these mixed-identity cells  
187 have properties different from single hormone transcript-expressing cells. In the current study we  
188 analyzed the proportions of single hormone transcript-expressing and mixed-identity cells in islets



189 from non-diabetic and type 2 diabetic donors and further, explored the iGABA<sub>A</sub>R-mediated  
190 currents peculiar to a specific mixed-identity cell subtype.

191 Studies of type 2 diabetes have shown a decrease in the  $\beta$  cell mass and a concomitant  
192 augmentation in the number of  $\alpha$  cells in islets from type 2 diabetic donors as compared to control  
193 subjects [18, 19]. Our cytosome analysis corroborate these results, revealing a decreased  
194 probability of identifying single-hormone *INS*-expressing  $\beta$  cells in islets from type 2 diabetic  
195 donors compared to islets from non-diabetic subjects. In contrast, the probability of identifying  
196 cells containing the *GCG* increased and, in particular, the percentage of single-hormone *GCG*-  
197 expressing  $\alpha$  cells increased in islets from type 2 diabetic donors. Whether this change is a cause  
198 or a consequence of the disease remains to be determined. Interestingly, different subtypes of the  
199 mixed-identity cells express hormone transcripts at variable levels, and several combinations  
200 exist. Importantly, however, no systematic change in the *GCG/INS* expression level was observed  
201 for the cells during the 10 days after isolation from the donors.

202 Apparently, the mixed-identity cells have distinct intracellular regulatory mechanisms  
203 governing particular hormone transcript expression. These cells may also differ in iGABA<sub>A</sub>R  
204 subunit composition and their expression levels that will be reflected in different patterns of  
205 single-channel iGABA<sub>A</sub>R openings.

206 We have previously characterized the functional properties of iGABA<sub>A</sub>R in human  $\alpha$  and  $\beta$   
207 cells [10]. Here, in mixed-identity  $\alpha/\beta$  cells, we found that cells having higher *GCG/INS*  
208 expression ratio correlated with no or low single-channel iGABA<sub>A</sub>R opening frequency and low-  
209 amplitude single-channel events and no response to GLP-1 application. This pattern of activity is  
210 very much similar to the behavior of iGABA<sub>A</sub>Rs in single-hormone *GCG*-expressing  $\alpha$  cells [10].  
211 On the other hand, mixed-identity  $\alpha/\beta$  cells with lower *GCG/INS* expression ratio had activity  
212 similar to single-hormone *INS*-expressing  $\beta$  cells [10] with higher frequency and larger  
213 amplitudes of single-channel iGABA<sub>A</sub>R openings. In the majority of the mixed-identity  $\beta/\delta$  cells  
214 we found that the *INS* expression level was higher than that for somatostatin and the pattern of

215 activity of single-channel iGABA<sub>A</sub>Rs was similar to the activity pattern in  $\beta$  cells. Together, the  
216 results identify the iGABA<sub>A</sub>Rs as a functional marker of the physiological identity of the mixed-  
217 identity cell subtype.

218 The explanations for the existence of mixed-identity cells in the human pancreatic islets  
219 may be many. The human islet is a plastic structure [1, 20, 21] and numerous factors [4, 5, 22],  
220 including GABA [23, 24] may influence the signatures of the cells. The cell-type determination  
221 has been proposed to take place during development [25] or alter due to dedifferentiation [22] or  
222 intentional reprogramming [7]. Further studies are required to identify factors and conditions  
223 regulating the cell-type identity [26].

224 The GABA signaling system is an integral part of the normal human pancreatic islet  
225 physiology [8, 27]. If pancreatic islet GABA concentration changes out of the physiological  
226 range, it may impair proper insulin and glucagon secretion, potentially alter cell fate [23, 24, 28]  
227 and eventually contribute to pathogenesis of type 2 diabetes. Moreover, interstitial GABA has  
228 also been proposed to inhibit cytotoxic immune cells entering the islets and is of potential  
229 importance for both type 1 and type 2 diabetes [28-30].

230 In conclusion, our results show that iGABA<sub>A</sub>R activity predicts the phenotype of the  
231 mixed-identity cells. Better understanding of the GABA signalling system effects in the human  
232 pancreatic islets will be valuable and may assist in unravelling the relationship between the  $\alpha$  and  
233 the  $\beta$  cells plus, potentially, how the intrinsic potential for regeneration of the  $\beta$  cell mass comes  
234 about.

235

## 236 **Acknowledgements**

237 The authors thank the Nordic Network for Clinical Islet Transplantation for generous providing  
238 human pancreatic islets. This work was supported by Swedish Research Council grants (grant  
239 numbers 521-2009-4021, 521-2012-1789, 2015-02417 to B.B.), Diabetes Wellness, Swedish  
240 Diabetes Foundation, the Novo Nordisk Foundation, The Swedish Children's Diabetes

241 Foundation, Family Ernfors Foundation, The strategic grant consortium Excellence of Diabetes  
242 Research in Sweden (EXODIAB). S.V.K. was supported by E. Wessler's foundation and Astrid  
243 Karlsson's foundation for medical research (Uppsala University) as well as Thuring's Foundation.

244

#### 245 **Author Contributions**

246 S.V.K., Z.J. and B.B. designed experiments; S.V.K. and Z.J. performed experiments; S.V.K. and  
247 Z.J. analysed data; S.V.K. made the figures; S.V.K. and B.B. wrote the manuscript. B.B. is the  
248 guarantor of this work and, as such, had full access to all the data in the study and takes  
249 responsibility for the integrity of the data and the accuracy of the data analysis.

250

#### 251 **Additional Information**

252 **Competing Interests:** B.B. has filed two patent applications based on GABA and GABA<sub>A</sub>  
253 receptors function. S.V.K. and Z.J. have no conflict of interests to disclose.

254

#### 255 **References**

- 256 1. Steiner DJ, Kim A, Miller K, Hara M. Pancreatic islet plasticity: interspecies  
257 comparison of islet architecture and composition. *Islets*. 2010;2(3):135-45. PubMed PMID:  
258 20657742; PubMed Central PMCID: PMC2908252.
- 259 2. Muraro MJ, Dharmadhikari G, Grün D, Groen N, Dielen T, Jansen E, et al. A Single-Cell  
260 Transcriptome Atlas of the Human Pancreas. *Cell Syst*. 2016;3(4):385-94.e3. Epub  
261 2016/09/29. doi: 10.1016/j.cels.2016.09.002. PubMed PMID: 27693023; PubMed Central  
262 PMCID: PMC5092539.
- 263 3. Segerstolpe Å, Palasantza A, Eliasson P, Andersson EM, Andréasson AC, Sun X, et al.  
264 Single-Cell Transcriptome Profiling of Human Pancreatic Islets in Health and Type 2  
265 Diabetes. *Cell Metab*. 2016;24(4):593-607. Epub 2016/09/22. doi:  
266 10.1016/j.cmet.2016.08.020. PubMed PMID: 27667667; PubMed Central PMCID:  
267 PMC5069352.
- 268 4. White MG, Marshall HL, Rigby R, Huang GC, Amer A, Booth T, et al. Expression of  
269 mesenchymal and  $\alpha$ -cell phenotypic markers in islet  $\beta$ -cells in recently diagnosed diabetes.  
270 *Diabetes Care*. 2013;36(11):3818-20. Epub 2013/09/23. doi: 10.2337/dc13-0705. PubMed  
271 PMID: 24062329; PubMed Central PMCID: PMC3816907.
- 272 5. Sun J, Ni Q, Xie J, Xu M, Zhang J, Kuang J, et al. Beta cell dedifferentiation in T2D  
273 patients with adequate glucose control and non-diabetic chronic pancreatitis. *J Clin*  
274 *Endocrinol Metab*. 2018. Epub 2018/08/03. doi: 10.1210/jc.2018-00968. PubMed PMID:  
275 30085195.

- 276 6. Cigliola V, Thorel F, Chera S, Herrera PL. Stress-induced adaptive islet cell identity  
277 changes. *Diabetes Obes Metab.* 2016;18 Suppl 1:87-96. doi: 10.1111/dom.12726. PubMed  
278 PMID: 27615136; PubMed Central PMCID: PMC5021189.
- 279 7. Kordowich S, Mansouri A, Collombat P. Reprogramming into pancreatic endocrine  
280 cells based on developmental cues. *Mol Cell Endocrinol.* 2010;315(1-2):11-8. Epub  
281 2009/11/06. doi: 10.1016/j.mce.2009.10.015. PubMed PMID: 19897012; PubMed Central  
282 PMCID: PMC2814956.
- 283 8. Braun M, Ramracheya R, Bengtsson M, Clark A, Walker JN, Johnson PR, et al. Gamma-  
284 aminobutyric acid (GABA) is an autocrine excitatory transmitter in human pancreatic beta-  
285 cells. *Diabetes.* 2010;59(7):1694-701. Epub 2010/04/22. doi: 10.2337/db09-0797. PubMed  
286 PMID: 20413510; PubMed Central PMCID: PMC2889769.
- 287 9. Taneera J, Jin Z, Jin Y, Muhammed SJ, Zhang E, Lang S, et al.  $\gamma$ -Aminobutyric acid  
288 (GABA) signalling in human pancreatic islets is altered in type 2 diabetes. *Diabetologia.*  
289 2012;55(7):1985-94. doi: 10.1007/s00125-012-2548-7. PubMed PMID: 22538358; PubMed  
290 Central PMCID: PMC3369140.
- 291 10. Korol SV, Jin Z, Jin Y, Bhandage AK, Tengholm A, Gandasi NR, et al. Functional  
292 Characterization of Native, High-Affinity GABAA Receptors in Human Pancreatic  $\beta$  Cells.  
293 *EBioMedicine.* 2018;30:273-82. Epub 2018/03/22. doi: 10.1016/j.ebiom.2018.03.014.  
294 PubMed PMID: 29606630; PubMed Central PMCID: PMC5952339.
- 295 11. Untereiner A, Abdo S, Bhattacharjee A, Gohil H, Pourasgari F, Ibeh N, et al. GABA  
296 promotes  $\beta$ -cell proliferation, but does not overcome impaired glucose homeostasis  
297 associated with diet-induced obesity. *FASEB J.* 2019;33(3):3968-84. Epub 2018/12/03. doi:  
298 10.1096/fj.201801397R. PubMed PMID: 30509117.
- 299 12. Tian J, Dang H, Chen Z, Guan A, Jin Y, Atkinson MA, et al.  $\gamma$ -Aminobutyric acid  
300 regulates both the survival and replication of human  $\beta$ -cells. *Diabetes.* 2013;62(11):3760-5.  
301 Epub 2013/08/30. doi: 10.2337/db13-0931. PubMed PMID: 23995958; PubMed Central  
302 PMCID: PMC3806626.
- 303 13. Fred RG, Bang-Berthelsen CH, Mandrup-Poulsen T, Grunnet LG, Welsh N. High  
304 glucose suppresses human islet insulin biosynthesis by inducing miR-133a leading to  
305 decreased polypyrimidine tract binding protein-expression. *PLoS One.* 2010;5(5):e10843.  
306 Epub 2010/05/26. doi: 10.1371/journal.pone.0010843. PubMed PMID: 20520763; PubMed  
307 Central PMCID: PMC2877094.
- 308 14. Braun M, Wendt A, Birnir B, Broman J, Eliasson L, Galvanovskis J, et al. Regulated  
309 exocytosis of GABA-containing synaptic-like microvesicles in pancreatic beta-cells. *J Gen  
310 Physiol.* 2004;123(3):191-204. Epub 2004/02/09. doi: 10.1085/jgp.200308966. PubMed  
311 PMID: 14769845; PubMed Central PMCID: PMC2217446.
- 312 15. Jin Y, Korol SV, Jin Z, Barg S, Birnir B. In intact islets interstitial GABA activates  
313 GABA(A) receptors that generate tonic currents in  $\alpha$ -cells. *PLoS One.* 2013;8(6):e67228.  
314 Epub 2013/06/24. doi: 10.1371/journal.pone.0067228. PubMed PMID: 23826240; PubMed  
315 Central PMCID: PMC3691163.
- 316 16. Briant LJ, Zhang Q, Vergari E, Kellard JA, Rodriguez B, Ashcroft FM, et al. Functional  
317 identification of islet cell types by electrophysiological fingerprinting. *J R Soc Interface.*  
318 2017;14(128). doi: 10.1098/rsif.2016.0999. PubMed PMID: 28275121; PubMed Central  
319 PMCID: PMC5378133.
- 320 17. Tornehave D, Kristensen P, Rømer J, Knudsen LB, Heller RS. Expression of the GLP-1  
321 receptor in mouse, rat, and human pancreas. *J Histochem Cytochem.* 2008;56(9):841-51.  
322 Epub 2008/06/09. doi: 10.1369/jhc.2008.951319. PubMed PMID: 18541709; PubMed  
323 Central PMCID: PMC2516959.
- 324 18. Yoon KH, Ko SH, Cho JH, Lee JM, Ahn YB, Song KH, et al. Selective beta-cell loss and  
325 alpha-cell expansion in patients with type 2 diabetes mellitus in Korea. *J Clin Endocrinol  
326 Metab.* 2003;88(5):2300-8. doi: 10.1210/jc.2002-020735. PubMed PMID: 12727989.

- 327 19. Deng S, Vatamaniuk M, Huang X, Doliba N, Lian MM, Frank A, et al. Structural and  
328 functional abnormalities in the islets isolated from type 2 diabetic subjects. *Diabetes*.  
329 2004;53(3):624-32. PubMed PMID: 14988246.
- 330 20. Dorrell C, Schug J, Canaday PS, Russ HA, Tarlow BD, Grompe MT, et al. Human islets  
331 contain four distinct subtypes of  $\beta$  cells. *Nat Commun*. 2016;7:11756. Epub 2016/07/11.  
332 doi: 10.1038/ncomms11756. PubMed PMID: 27399229; PubMed Central PMCID:  
333 PMCPMC4942571.
- 334 21. Wang YJ, Golson ML, Schug J, Traum D, Liu C, Vivek K, et al. Single-Cell Mass  
335 Cytometry Analysis of the Human Endocrine Pancreas. *Cell Metab*. 2016;24(4):616-26. doi:  
336 10.1016/j.cmet.2016.09.007. PubMed PMID: 27732837; PubMed Central PMCID:  
337 PMCPMC5123805.
- 338 22. Teo AKK, Lim CS, Cheow LF, Kin T, Shapiro JA, Kang NY, et al. Single-cell analyses of  
339 human islet cells reveal de-differentiation signatures. *Cell Death Discov*. 2018;4:14. Epub  
340 2018/02/09. doi: 10.1038/s41420-017-0014-5. PubMed PMID: 29531811; PubMed Central  
341 PMCID: PMCPMC5841351.
- 342 23. Ben-Othman N, Vieira A, Courtney M, Record F, Gjernes E, Avolio F, et al. Long-Term  
343 GABA Administration Induces Alpha Cell-Mediated Beta-like Cell Neogenesis. *Cell*.  
344 2017;168(1-2):73-85.e11. Epub 2016/12/01. doi: 10.1016/j.cell.2016.11.002. PubMed  
345 PMID: 27916274.
- 346 24. Li J, Casteels T, Frogne T, Ingvorsen C, Honoré C, Courtney M, et al. Artemisinins  
347 Target GABAA Receptor Signaling and Impair Alpha Cell Identity. *Cell*. 2017;168(1-2):86-  
348 100.e15. Epub 2016/12/01. doi: 10.1016/j.cell.2016.11.010. PubMed PMID: 27916275;  
349 PubMed Central PMCID: PMCPMC5236063.
- 350 25. Riedel MJ, Asadi A, Wang R, Ao Z, Warnock GL, Kieffer TJ. Immunohistochemical  
351 characterisation of cells co-producing insulin and glucagon in the developing human  
352 pancreas. *Diabetologia*. 2012;55(2):372-81. Epub 2011/10/25. doi: 10.1007/s00125-011-  
353 2344-9. PubMed PMID: 22038519.
- 354 26. Furuyama K, Chera S, van Gorp L, Oropeza D, Ghila L, Damond N, et al. Diabetes relief  
355 in mice by glucose-sensing insulin-secreting human  $\alpha$ -cells. *Nature*. 2019;567(7746):43-8.  
356 Epub 2019/02/13. doi: 10.1038/s41586-019-0942-8. PubMed PMID: 30760930.
- 357 27. Caicedo A. Paracrine and autocrine interactions in the human islet: more than meets  
358 the eye. *Semin Cell Dev Biol*. 2013;24(1):11-21. Epub 2012/09/25. doi:  
359 10.1016/j.semcd.2012.09.007. PubMed PMID: 23022232; PubMed Central PMCID:  
360 PMCPMC3570628.
- 361 28. Soltani N, Qiu H, Aleksic M, Glinka Y, Zhao F, Liu R, et al. GABA exerts protective and  
362 regenerative effects on islet beta cells and reverses diabetes. *Proc Natl Acad Sci U S A*.  
363 2011;108(28):11692-7. doi: 10.1073/pnas.1102715108. PubMed PMID: 21709230;  
364 PubMed Central PMCID: PMCPMC3136292.
- 365 29. Bjurström H, Wang J, Ericsson I, Bengtsson M, Liu Y, Kumar-Mendu S, et al. GABA, a  
366 natural immunomodulator of T lymphocytes. *J Neuroimmunol*. 2008;205(1-2):44-50. Epub  
367 2008/10/26. doi: 10.1016/j.jneuroim.2008.08.017. PubMed PMID: 18954912.
- 368 30. Bhandage AK, Jin Z, Korol SV, Shen Q, Pei Y, Deng Q, et al. GABA Regulates Release of  
369 Inflammatory Cytokines From Peripheral Blood Mononuclear Cells and CD4+ T Cells and Is  
370 Immunosuppressive in Type 1 Diabetes. *EBioMedicine*. 2018;30:283-94. Epub 2018/03/28.  
371 doi: 10.1016/j.ebiom.2018.03.019. PubMed PMID: 29627388; PubMed Central PMCID:  
372 PMCPMC5952354.
- 373  
374

## 375 **FIGURE LEGENDS**

376 **Figure 1.** Percentage distribution of single and multiple hormone transcript-expressing cells (**A**)  
377 and relations between duration of islet culturing (**B**) and relative gene expression (**C**) versus cell  
378 membrane capacitance in intact human pancreatic islets from non-diabetic (ND) and type 2  
379 diabetic (T2D) donors. Relative gene expression in (**C**) is read as the *GCG/INS* expression ratio  
380 for mixed-identity  $\alpha/\beta$  cells (magenta circles), *INS/SST* expression ratio for mixed-identity  $\beta/\delta$   
381 cells (green circles) and *GCG/SST* expression ratio for mixed-identity  $\alpha/\delta$  cell (gray circle).  
382 Correlations neither in (**B**) (Spearman correlation coefficient for ND group  $r = 0.140$ ,  $P = 0.410$ ,  $n$   
383  $= 37$ ; for T2D group  $r = -0.274$ ,  $P = 0.514$ ,  $n = 8$ ), nor in (**C**) (Spearman correlation coefficient  
384 for ND group  $r = -0.019$ ,  $P = 0.910$ ,  $n = 37$ ; for T2D group  $r = -0.238$ ,  $P = 0.582$ ,  $n = 8$ ) are  
385 revealed.

386

387 **Figure 2.** Ratios of hormone mRNA expressions in individual mixed-identity cells with two  
388 hormone transcripts and iGABA<sub>A</sub>R-mediated currents in islet cells. (**A**) and (**B**): The scatter dot  
389 plot of *GCG/INS* expression ratios in mixed-identity  $\alpha/\beta$  cells (**A**) and representative current  
390 recordings through iGABA<sub>A</sub>Rs (**B**) in  $\alpha/\beta$  cells with high (a), low (d) and comparable (c) levels of  
391 expression of *INS* relative to the expression level of *GCG*. Dash line at the *GCG/INS* expression  
392 ratio = 1 in (**A**) shows equal expression of both hormone transcripts. The higher *GCG/INS*  
393 expression ratio, the more  $\alpha/\beta$  cell is  $\alpha$ -like (upward arrow); the lower *GCG/INS* expression ratio,  
394 the more  $\alpha/\beta$  cell is  $\beta$ -like (downward arrow). (**C**): *GCG/SST* expression ratio in an  $\alpha/\delta$  cell and  
395 corresponding recording of iGABA<sub>A</sub>R-mediated current (**D**) in this cell. Two iGABA<sub>A</sub>R single-  
396 channel events with low amplitudes are shown at expanded time scale. (**E**): The scatter dot plot of  
397 *INS/SST* expression ratios in  $\beta/\delta$  cells and representative current recordings through iGABA<sub>A</sub>Rs  
398 (**F**) in  $\beta/\delta$  cells. For dash line and arrows in (**C**), (**E**) see explanations in (**A**) in context of the  
399 respective hormone transcripts. (**G**): Representative recordings showing high activity of single-  
400 channel iGABA<sub>A</sub>Rs in a  $\beta$  cell and low activity of single-channel iGABA<sub>A</sub>Rs and lower current

401 amplitudes in an  $\alpha$  cell in the presence of 10 nM GABA in ND donors. A single-channel  
402 iGABA<sub>A</sub>R opening with low amplitude is shown at expanded time scale. Closed and open states  
403 of the single channels are denoted by corresponding dash lines on the recordings **(B)**, **(D)**, **(F)**,  
404 **(G)**. The scale bars 5 pA and 200 ms are common for the recordings **Ba**, **c–e** and **Ff–h**; recordings  
405 **Bb** and **Fi** have vertical scale bar 10 pA. Recordings **d**, **g–i** were done in the presence of 10 nM  
406 GABA first (black traces), and then 50 pM GLP-1 was added to the extracellular solution in order  
407 to examine the potentiation of iGABA<sub>A</sub>Rs via the activation of GLP-1 receptor (blue traces). The  
408 recordings in **Ba–b** were done without exogenously added GABA, and the rest of recordings were  
409 done in the presence of 10 nM GABA.

410

411 **Figure 3.** Frequency of single-channel iGABA<sub>A</sub>R openings in mixed-identity  $\alpha/\beta$  cells and  
412 combined data for mixed-identity  $\alpha/\beta/\delta$  cells. **(A)**: Anticorrelation between frequency of single-  
413 channel iGABA<sub>A</sub>R openings and the relative *GCG/INS* gene expression in individual mixed-  
414 identity  $\alpha/\beta$  cells showing the higher *INS* expression in the  $\alpha/\beta$  cell (= the more mixed-identity cell  
415 is a  $\beta$ -like), the higher frequency of the single-channel iGABA<sub>A</sub>R openings in such a cell.  
416 Spearman correlation coefficient  $r = -0.89$ ,  $P < 0.0001$ ,  $n = 18$ . **(B)**: The frequency of single-  
417 channel iGABA<sub>A</sub>R openings in the  $\alpha/\beta$  cells with the *GCG/INS* ratio between 0.002 and 0.6 ( $\beta$ -  
418 like cells, see **A**) is significantly higher than that in  $\alpha/\beta$  cells with the *GCG/INS* ratio between 1.2  
419 and 550 ( $\alpha$ -like cells, see **A**). Nonparametric Mann-Whitney test,  $***P < 0.0001$ ,  $n = 9$  in the  $\beta$ -  
420 like group,  $n = 8$  in the  $\alpha$ -like group. The uppermost data point in the  $\alpha$ -like group was obtained  
421 from T2D donor, detected as outlier by Tukey method and excluded from the comparison. **(C)**:  
422 Hormone transcript expression in individual mixed-identity  $\alpha/\beta/\delta$  cell presented as the *GCG/INS*  
423 expression ratio in the cell versus the expression of the *SST* in the same cell divided by the  
424 maximal expression of the *SST* among all mixed-identity  $\alpha/\beta/\delta$  cells ( $SST/SST_{max}$ ). The lower  
425  $SST/SST_{max}$  ratio, the more negligible *SST* component in mixed-identity  $\alpha/\beta/\delta$  cell, and then the  
426 cell is considered as mixed-identity  $\alpha/\beta$  cell. Thus, to be e.g.  $\beta$ -like, mixed-identity  $\alpha/\beta/\delta$  cell  
427 should fall into lower left part of the scatter plot (downward arrow). **(D)**: Recordings of

428 iGABA<sub>A</sub>R-mediated currents in three individual mixed-identity  $\alpha/\beta/\delta$  cells marked on Ca-c from  
429 non-diabetic donors (a, b) and a type 2 diabetic donor (c). Electrophysiological recordings were  
430 done at the  $V_h = -70$  mV. Pancreatic islets were exposed to 10 nM GABA.



**A**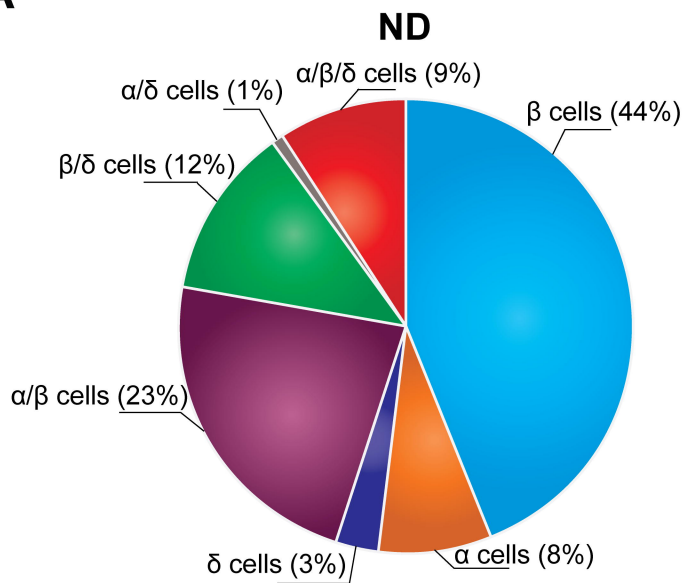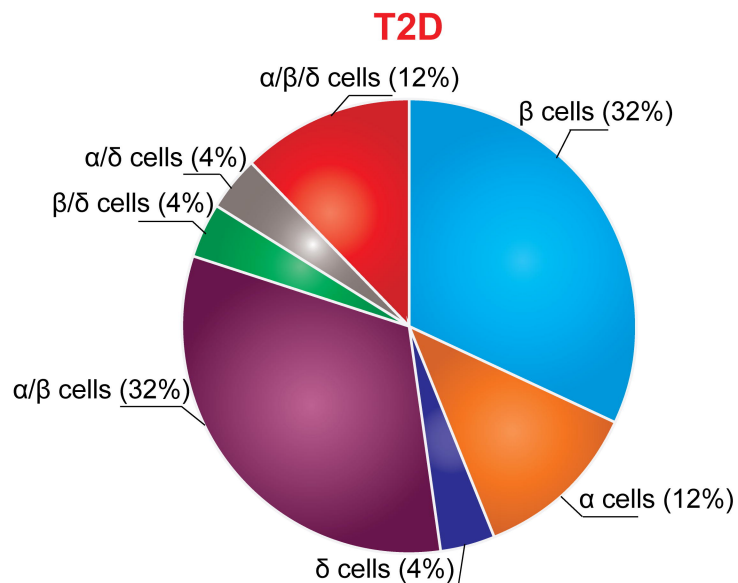**B**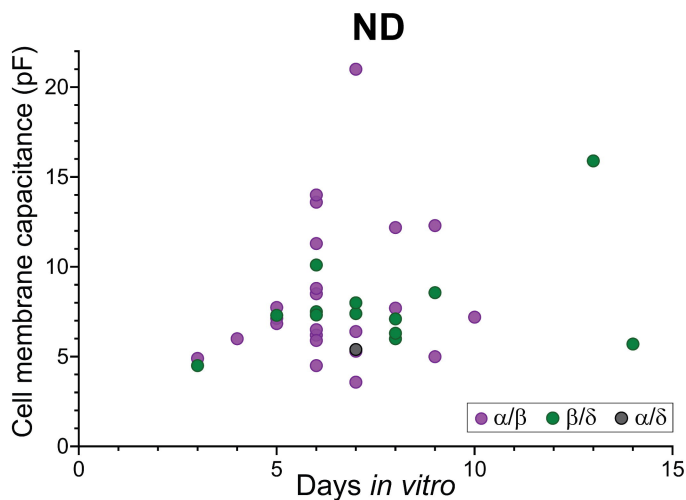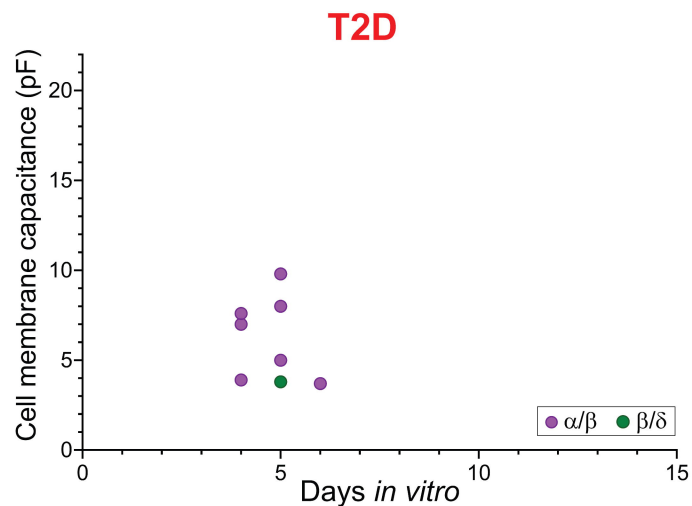**C**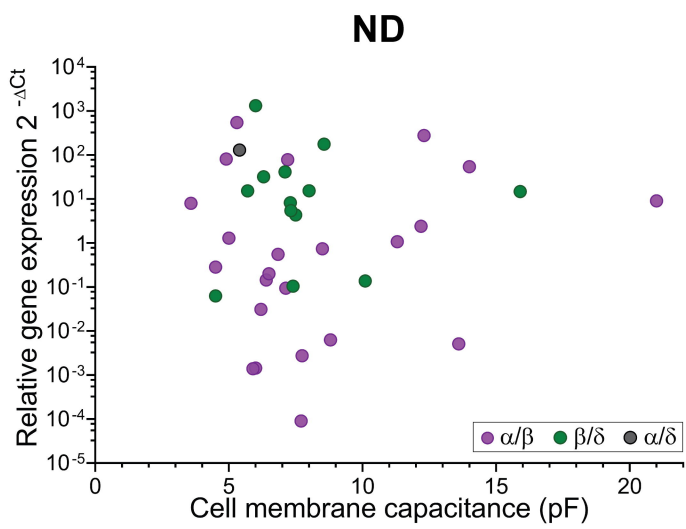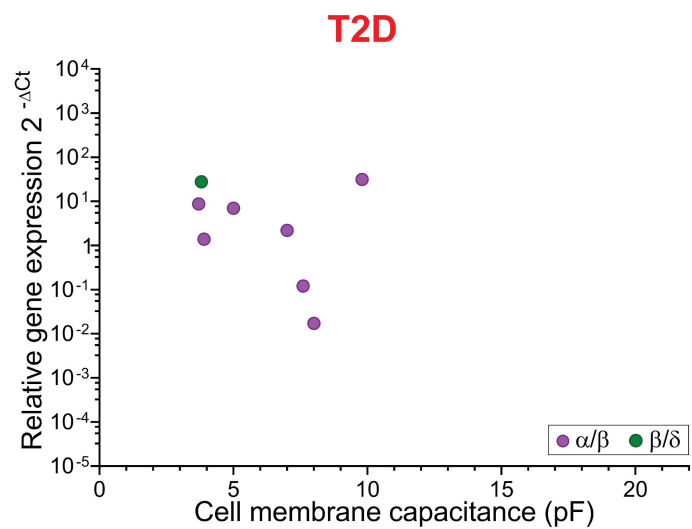

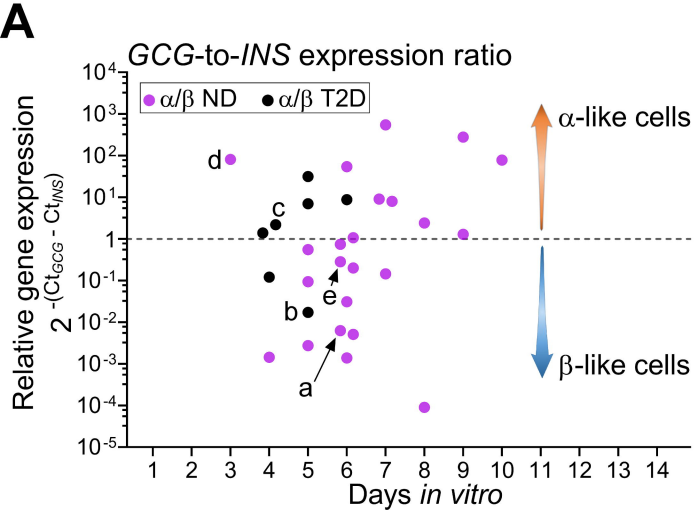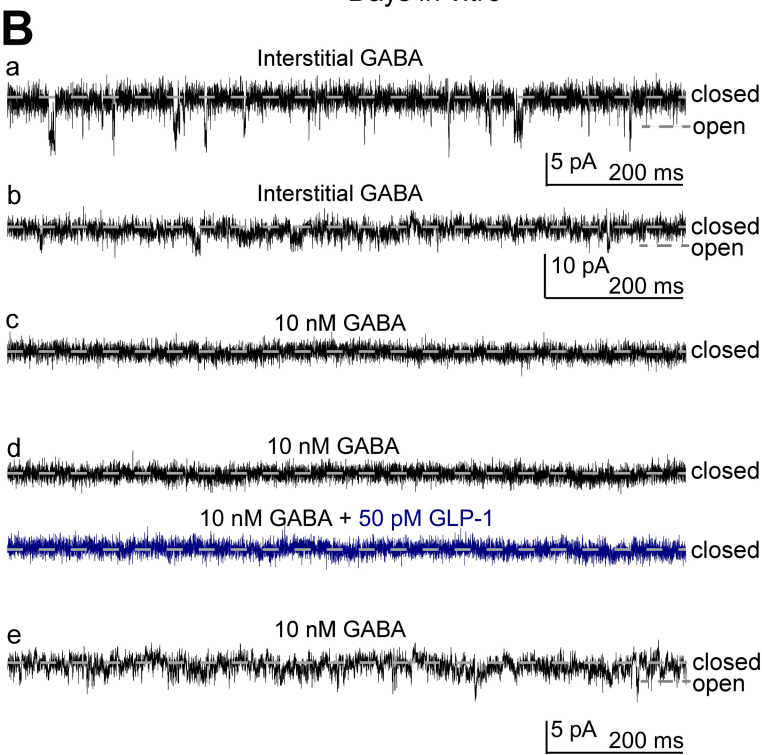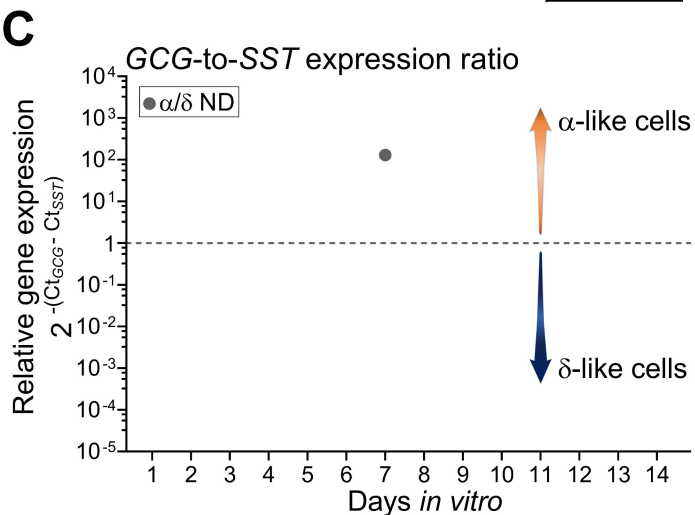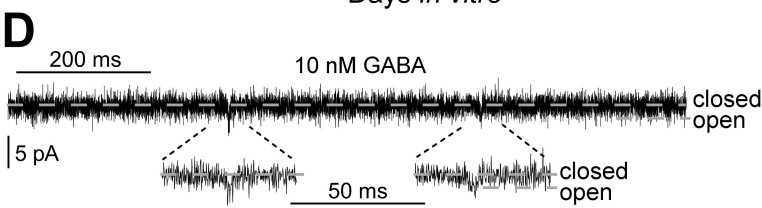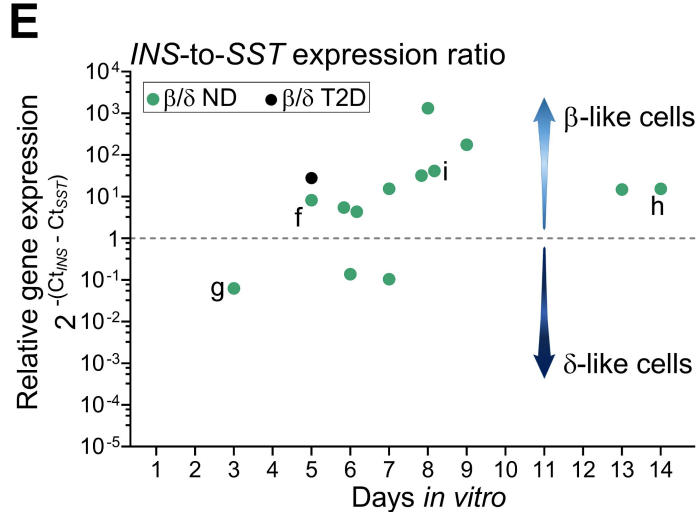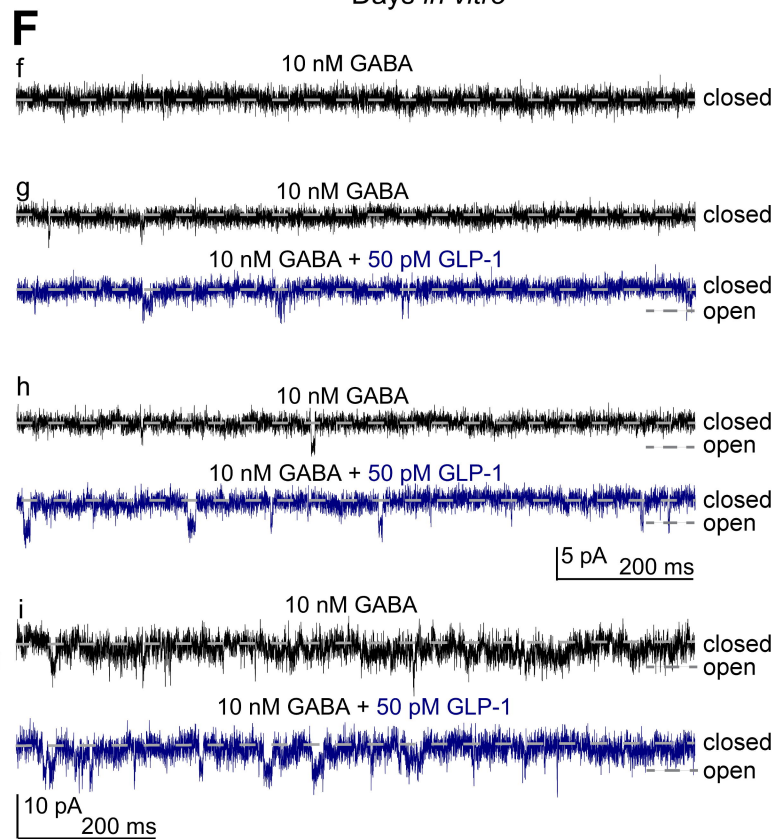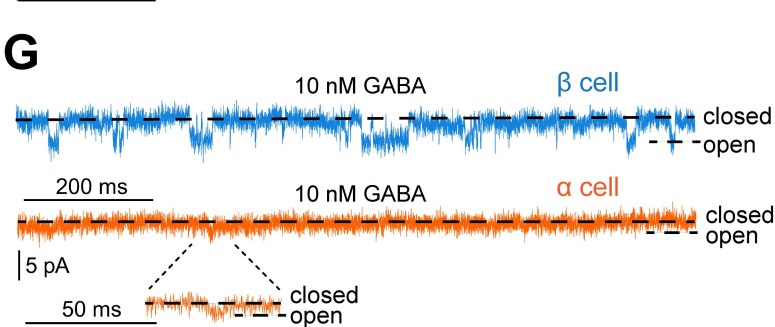

**A**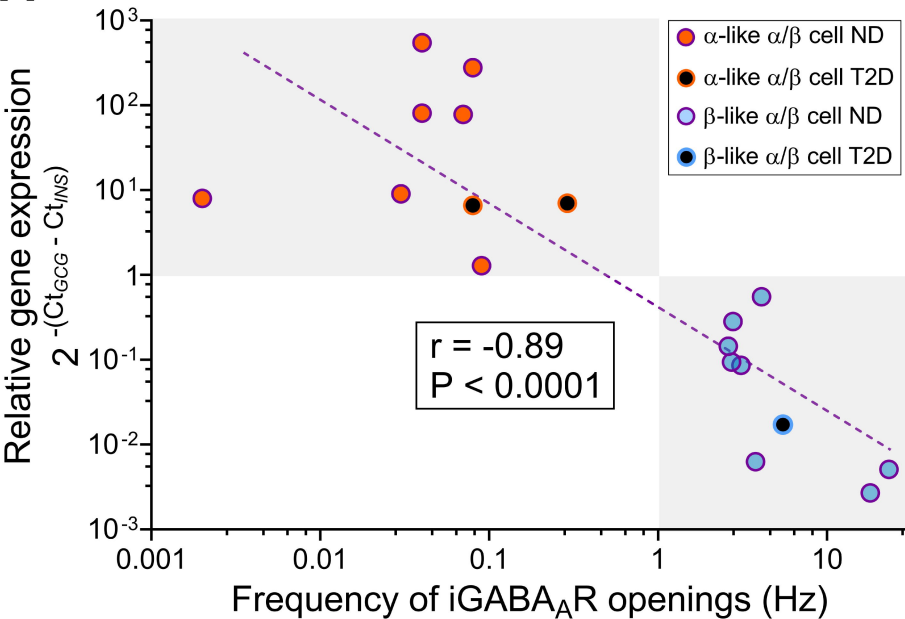**B**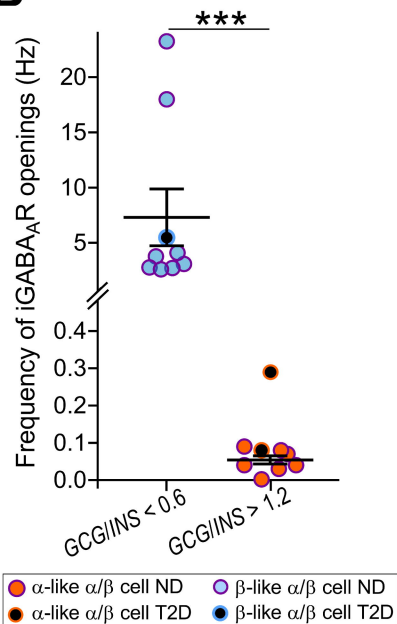**C**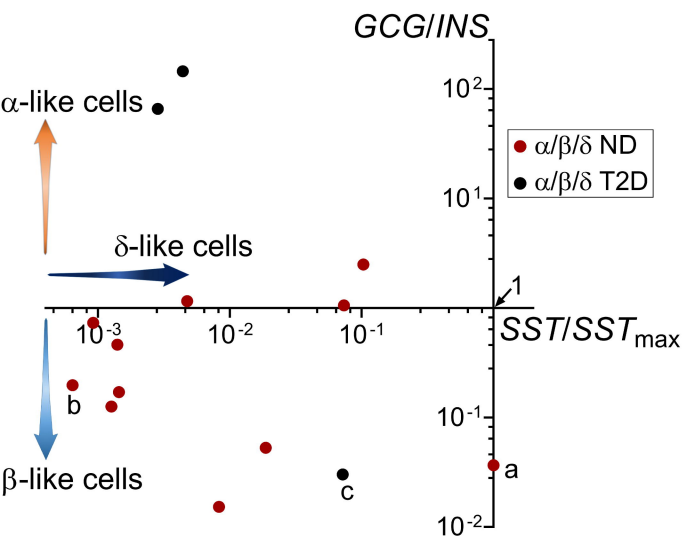**D**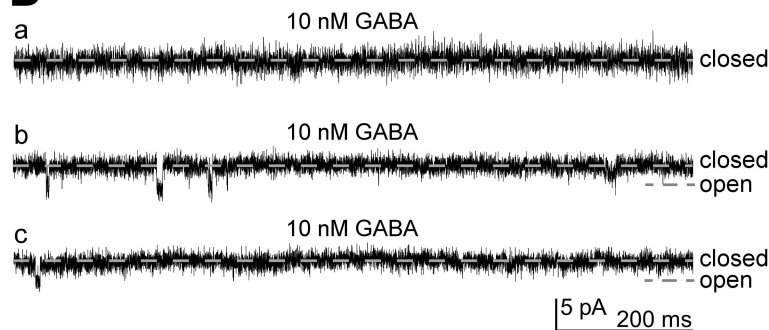

Source: https://biorxiv.org/content/biorxiv/early/2019/05/12/635144.full-text.pdf
